1 **Investigating pleiotropy between depression and autoimmune diseases using the UK Biobank.**

2 Kylie P Glanville<sup>1</sup>, Jonathan R I Coleman<sup>1,2</sup>, Paul F O'Reilly<sup>3</sup>, \*James Galloway<sup>4</sup>, \*Cathryn M  
3 Lewis<sup>1,2,5</sup>

4 \*Contributed equally and share senior authorship.

5 1. Social Genetic and Developmental Psychiatry Centre, Institute of Psychiatry, Psychology &  
6 Neuroscience, King's College London, London, GB

7 2. NIHR Biomedical Research Centre, South London and Maudsley NHS Trust, King's College  
8 London, London, GB

9 3. Genetics and Genomic Sciences, Icahn School of Medicine, Mount Sinai, New York, NY, US

10 4. Department of Inflammation Biology, King's College London, London, GB

11 5. Department of Medical & Molecular Genetics, King's College London, London, GB

12

13 **Address correspondence to** Kylie P. Glanville, [kylie.glanville@kcl.ac.uk](mailto:kylie.glanville@kcl.ac.uk); Social, Genetic and  
14 Developmental Psychiatry Centre; Institute of Psychiatry, Psychology & Neuroscience; King's  
15 College London, de Crespigny Park, London SE5 8AF; UK.

## 16 Abstract

17 **Background:** Epidemiological studies have shown increased comorbidity between depression  
18 and autoimmune diseases. The mechanisms driving the comorbidity are poorly understood, and  
19 a highly powered investigation is needed to understand the relative importance of shared genetic  
20 influences. We investigated the evidence for pleiotropy from shared genetic risk alleles between  
21 these traits in the UK Biobank (UKB).

22 **Methods:** We defined autoimmune and depression cases using information from hospital  
23 episode statistics, self-reported conditions and medications, and mental health questionnaires.  
24 Pairwise comparisons of depression prevalence between autoimmune cases and controls, and  
25 vice-versa, were performed. Cross-trait polygenic risk score (PRS) analyses were performed to  
26 test for pleiotropy, i.e. testing whether PRS for depression could predict autoimmune disease  
27 status, and vice-versa.

28 **Results:** We identified 28k cases of autoimmune diseases (pooling across 14 traits) and 324k  
29 autoimmune controls, and 65k cases of depression and 232k depression controls. The prevalence  
30 of depression was significantly higher in autoimmune cases compared to controls, and vice-versa.  
31 PRS for myasthenia gravis and psoriasis were significantly higher in depression cases compared  
32 to controls ( $p < 5.2 \times 10^{-5}$ ,  $R^2 \leq 0.04\%$ ). PRS for depression were significantly higher in  
33 inflammatory bowel disease, psoriasis, psoriatic arthritis, rheumatoid arthritis and type 1  
34 diabetes cases compared to controls ( $p < 5.8 \times 10^{-5}$ ,  $R^2$  range 0.06% to 0.27%), and lower in coeliac  
35 disease cases compared to controls ( $p < 5.4 \times 10^{-7}$ ,  $R^2$  range 0.11% to 0.15%).

36 **Conclusions:** Consistent with the literature, depression was more common in individuals with  
37 autoimmune diseases compared to controls, and vice-versa, in the UKB. PRS showed some  
38 evidence for involvement of shared genetic factors, but the modest  $R^2$  values suggest that shared  
39 genetic architecture accounts for only a small proportion of the increased risk across traits.

## 40 Introduction

41 There is evidence that individuals with a history of autoimmune disease are at greater risk for  
42 developing depression<sup>1-4</sup>, and that a history of depression increases risk for developing  
43 autoimmune diseases<sup>5,6</sup>. The mechanisms driving the bi-directional relationship are poorly  
44 understood, but one contributory factor may be that these diseases share biological pathways.  
45 We and others have shown that there is no strong evidence for the involvement of Human  
46 Leukocyte Antigen (HLA) alleles in risk for depression, suggesting that the Major  
47 Histocompatibility Complex (MHC) does not harbor shared risk for depression and autoimmune  
48 diseases<sup>6-8</sup>. However, genetic risk for autoimmune diseases occurs across the genome<sup>9</sup>, and  
49 pleiotropic effects outside the MHC may be involved in shared risk for depression and  
50 autoimmune diseases.

51 Few studies have investigated evidence for genome-wide pleiotropy between depression and  
52 autoimmune diseases. Euesden, et al.<sup>10</sup> found no evidence for association between polygenic risk  
53 scores (PRS) for depression and risk for rheumatoid arthritis, or vice-versa. The Psychiatric  
54 Genomics Consortium (PGC) indicated no evidence for significant genetic correlations (rG)  
55 between depression and nine autoimmune diseases (after multiple testing correction across 221  
56 traits in total); the strongest correlation observed was between depression and inflammatory  
57 bowel disease (rG = .07, uncorrected p = .01)<sup>11</sup>. Recently, Liu, et al.<sup>6</sup> found no association  
58 between PRS for mental health disorders and risk for autoimmune diseases, and only a weak  
59 association between PRS for autoimmune diseases and risk for mental health disorders.

60 We extend previous work, leveraging the UK Biobank (UKB) to test for pleiotropy between  
61 depression and autoimmune diseases with PRS methodology. Given the challenge of reliably  
62 defining complex disease traits using large-scale data, we take two approaches to defining  
63 autoimmune diseases and depression. We classified liberally-defined cases, based on a single  
64 item endorsing diagnosis with an autoimmune disease, and strictly-defined cases, based on  
65 multiple items. We use this approach to identify individuals affected by any of fourteen  
66 autoimmune or autoinflammatory traits - collectively referred to as autoimmune diseases  
67 throughout. We take a similar approach to classifying depression by requiring a greater number  
68 of endorsements in strictly-defined cases than liberally-defined cases. Liberally-defined cases  
69 increase the sample size, while strictly-defined cases will reduce the rate of misclassification. We  
70 perform cross-trait PRS analyses, testing for association between PRS for autoimmune diseases  
71 and depression, and vice-versa. Motivated by the observation of sex-dependent genetic  
72 correlations between schizophrenia and autoimmune diseases<sup>12</sup>, and by higher prevalence in  
73 females of both depression and autoimmune diseases, we stratified PRS analyses by sex. Our  
74 study is one of the largest to explore pleiotropy between depression and autoimmune diseases  
75 and elucidates the contribution of shared genetic influences to the observed comorbidity.

## 76 Methods

### 77 Participants

78 The UKB is a prospective health study of 500,000 individuals in the United Kingdom. Participants  
79 were identified through NHS patient registers if they were aged 40-69 during the recruitment  
80 phase (2006-2010) and living in proximity to an assessment centre. Participants attended a  
81 baseline assessment and contributed health information via touchscreen questionnaires and  
82 verbal interviews<sup>13</sup>. Subsets of participants completed repeat assessments: instance 1) n = 20,335  
83 between 2012-2013; instance 2) n = 42,961 (interview) and n = 48,340 (touchscreen) in 2014;  
84 and instance 3) n = 2,843 (interview) and n = 3,081 (touchscreen) in 2019. Participant data are  
85 linked to Hospital Episode Statistics (HES) containing information on episodes of inpatient care.  
86 Episodes are coded at admission using the International Classification of Diseases, 10<sup>th</sup> Revision<sup>14</sup>  
87 (ICD-10). Inpatients are assigned one primary code (reason for admission) and a variable number  
88 of secondary codes. Additional data are available for psychiatric phenotyping, including an online  
89 Mental Health Questionnaire (MHQ) completed by 157,366 participants in 2017<sup>15</sup>. The UKB  
90 received ethical approval from the North West - Haydock Research Ethics Committee (reference  
91 16/NW/0274). Participants provided electronic signed consent at recruitment<sup>13</sup>.

### 92 Autoimmune phenotyping

93 Guided by studies that investigated the epidemiological relationship between autoimmune  
94 diseases and depression<sup>1,5</sup>, we identified cases for fourteen autoimmune diseases: pernicious

95 anemia (PA), autoimmune thyroid disease (ATD), type 1 diabetes (T1D), multiple sclerosis (MS),  
96 myasthenia gravis (MG), coeliac, inflammatory bowel disease (IBD; includes crohn's disease and  
97 ulcerative colitis), psoriasis, ankylosing spondylitis (AS), polymyalgia rheumatica/giant cell  
98 arteritis (PR/GCA), psoriatic arthritis (PsA), rheumatoid arthritis (RA), sjögren syndrome (SS), and  
99 systemic lupus erythematosus (SLE).

100 Two sources of information were used to define autoimmune cases and controls. (1) HES: primary  
101 and secondary ICD-10 diagnoses recorded between April 1997 to October 2016 were identified  
102 from the UKB Data Portal Record Repository. (2) Verbal interview: participants' responses at  
103 baseline or instance 1 or 2 to determine self-endorsed medical conditions (past and current) and  
104 self-endorsed prescription medications (current). ICD-10 codes, self-endorsed conditions and  
105 medications used to define each autoimmune disease are listed in the Supplementary Material.

106 We took two approaches to defining autoimmune cases (Figure 1). To increase sample size, we  
107 created 'possible' cases, comprising participants with an ICD-10 diagnosis or a self-endorsed  
108 condition. To increase validity, we used multiple observations to create 'probable' cases.  
109 Participants were coded as probable cases if at least two of ICD-10 diagnosis, self-endorsed  
110 condition or medication were observed. More than one ICD-10 diagnosis for the corresponding  
111 autoimmune disease was also sufficient. A set of autoimmune controls was defined from  
112 participants with no ICD-10 diagnoses, self-endorsed conditions or medications for all fourteen  
113 autoimmune diseases. A single set of controls was used for all autoimmune diseases, given the  
114 known comorbidity between them.

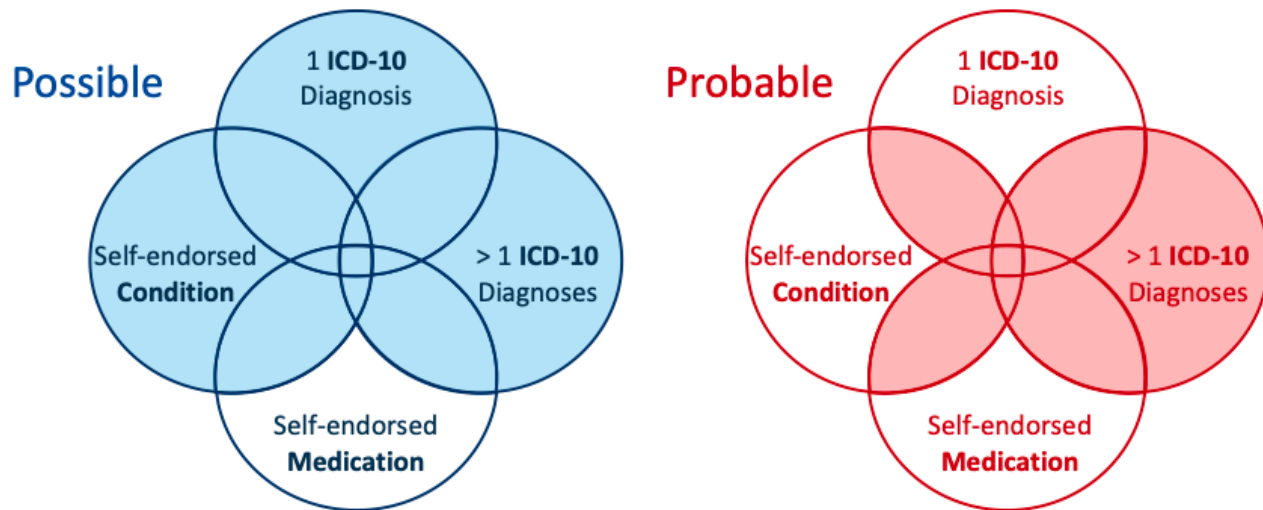

115

116 Figure 1: Autoimmune phenotyping approach. Cases are included in possible or probable if they fall within a  
117 shaded area. Autoimmune medication was used as a confirmatory, but not a primary source of information,  
118 because several medications are not disease-specific.

119

## 120 Depression phenotyping

121 We created two depression case groups: strictly-defined cases termed 'stringent depression' and  
122 liberally-defined cases termed 'any depression'. We have previously shown that SNP-based  
123 heritability increases with multiple endorsements of depression<sup>16</sup>. We therefore classified  
124 'stringent depression' as participants endorsing at least three of the following depression  
125 measures: ICD-10 diagnoses (F32-F33.9); self-reported depression; self-reported antidepressant  
126 usage; single or recurrent depression (defined by Smith, et al.<sup>17</sup> from responses to a  
127 questionnaire completed at baseline by 172,751 participants); or answered 'yes' to the



128 questionnaire: "Have you ever seen a GP/psychiatrist for nerves, anxiety, tension or  
129 depression?".

130 We classified 'any depression' as participants who endorsed two or more depression measures,  
131 or if they met criteria for lifetime depression in the Composite International Diagnostic Interview  
132 (CIDI) assessed in the MHQ<sup>15</sup>. We classify cases defined from CIDI alone as 'any depression' not  
133 as 'stringent depression' because we previously observed lower SNP-based heritability in this  
134 group ( $h^2_{\text{SNP}} = 11\%$ ,  $SE = 0.008$ ) compared to cases defined by three or more non-CIDI measures  
135 of depression ( $h^2_{\text{SNP}} = 19\%$ ,  $SE = 0.018$ )<sup>16</sup>.

136 Depression cases were screened for schizophrenia and bipolar according to any indication: ICD-  
137 10 diagnoses (F20-29, F30-31.9, F34-39); self-endorsed conditions (schizophrenia, mania, bipolar  
138 disorder or manic depression) or self-endorsed antipsychotic usage reported at baseline or  
139 instance 1 or 2; Bipolar Type I (Mania) or Bipolar Type II (Hypomania) according to the criteria  
140 adopted by Smith, et al.<sup>17</sup>; or indications of psychosis endorsed in the MHQ. A single set of  
141 depression controls was defined from participants who did not meet the criteria for depression,  
142 schizophrenia or bipolar.

143 Derivation of depression, schizophrenia and bipolar indications can be found in Supplementary  
144 Materials from our previous publication<sup>16</sup>.

## 145 Genetic quality control (QC)

146 The UKB performed preliminary QC on genotype data assayed for all participants<sup>13</sup>. Using genetic  
147 principal components (PCs) provided by the UKB, we performed 4-means clustering on the first  
148 two PCs to identify and retain individuals of European ancestry. QC was then performed using  
149 PLINK v1.9<sup>18</sup> to remove: variants with missingness > 0.02 (before individual QC), individuals with  
150 missingness > 0.02, individuals whose self-reported sex was discordant from their genetic sex,  
151 variants with missingness > 0.02 (after individual QC), variants departing from Hardy-Weinberg  
152 Equilibrium ( $p < 10e-8$ ), and variants with minor allele frequency (MAF) < 0.01. Relatedness  
153 kinship estimates provided by the UKB were used to identify pairs of related individuals (KING  $r^2$   
154 > 0.044)<sup>19</sup> and the GreedyRelated<sup>20</sup> algorithm used to remove one individual from each pair,  
155 preferentially retaining individuals that survived QC. FlashPCA2<sup>21</sup> was used to generate PCs for  
156 the sub-set of individuals of European ancestry surviving QC. PRS analyses were performed using  
157 genotype data.

## 158 Statistical analyses

159 We summarised sociodemographic data taken at baseline assessment: age, sex, socio-economic  
160 status (SES), body mass index (BMI) and current smoking status. We tested for significant  
161 differences in sociodemographic variables between cases and controls using Welch Two Sample  
162 t-tests in R v3.6<sup>22</sup>. We tested for significant differences in: 1) the prevalence of depression in  
163 autoimmune cases compared to autoimmune controls, and 2) the prevalence of autoimmune  
164 diseases in depression cases compared to depression controls. These tests were performed for

165 both probable/possible autoimmune cases and stringent/any depression, using 2-sample tests  
166 for equality of proportions in R v3.6<sup>22</sup>.

### 167 [Summary statistics for autoimmune diseases and depression](#)

168 We searched PubMed and the NHGRI-EBI GWAS Catalog  
169 (<https://www.ebi.ac.uk/gwas/downloads/summary-statistics>) for the latest genome-wide  
170 association study (GWAS) with publicly-available summary statistics, using the name of the  
171 relevant trait (and “GWAS” or “genome-wide association study” on PubMed). We identified  
172 summary statistics for eight of the fourteen autoimmune diseases: coeliac<sup>23</sup>, IBD<sup>24</sup>, MS<sup>25</sup>, MG<sup>26</sup>,  
173 psoriasis<sup>27</sup>, PsA<sup>28</sup>, RA<sup>29</sup>, and SLE<sup>30</sup> (Table 1). For MG, psoriasis and PsA, we contacted the authors  
174 of the primary GWASs directly to obtain access. Summary statistics from GWAS using the  
175 ImmunoChip were excluded as it does not provide genome-wide coverage. For Major Depressive  
176 Disorder (MDD), we used summary statistics from Wray, et al.<sup>11</sup>, excluding UKB.

177 Table 1: GWAS summary statistics used to generate polygenic risk scores.

| Trait                      | Year | Ancestry | Assembly    | Cases   | Controls |
|----------------------------|------|----------|-------------|---------|----------|
| Coeliac Disease            | 2010 | European | GRCh37/hg19 | 4,533   | 10,750   |
| Inflammatory Bowel Disease | 2015 | European | GRCh37/hg19 | 12,882  | 21,770   |
| Multiple Sclerosis         | 2011 | European | GRCh37/hg19 | 9,772   | 17,376   |
| Myasthenia Gravis          | 2015 | European | GRCh37/hg19 | 1,032   | 1,998    |
| Psoriasis                  | 2017 | European | GRCh37/hg19 | 19,032  | 286,769  |
| Psoriatic Arthritis        | 2018 | European | GRCh37/hg19 | 1,430   | 1,417    |
| Rheumatoid Arthritis       | 2014 | European | GRCh37/hg19 | 14,361  | 43,923   |
| System Lupus Erythematosus | 2015 | European | GRCh37/hg19 | 7,219   | 15,991   |
| Major Depressive Disorder  | 2018 | European | GRCh37/hg19 | 116,404 | 314,990  |

178

## 179 Polygenic risk score (PRS) analyses

180 PRS analyses were conducted using the PRSice-2 software<sup>31</sup>. QC was performed on summary  
181 statistics to remove variants within the MHC (28.8 to 33.7 Mb), and default clumping settings  
182 were applied in PRSice-2 to remove variants in linkage disequilibrium ( $r^2 > 0.1$ ) with the lead  
183 variant within a 250kb region.

184 To validate our phenotyping approach, we tested for association between PRS for eight  
185 autoimmune diseases and case-control status for the corresponding diseases (possible and  
186 probable cases), and between PRS for MDD and case-control status for depression (any and  
187 stringent).

188 To investigate pleiotropy between autoimmune diseases and depression we performed cross-  
189 trait analyses, testing for association between 1) PRS for eight autoimmune diseases and case-  
190 control status for depression (any and stringent cases); and 2) PRS for MDD and case-control  
191 status for fourteen autoimmune diseases (possible and probable cases). To test for sex-specific  
192 effects, we performed cross-trait analyses in males and females separately.

193 For each test, PRS constructed at eight p-value thresholds ( $P_T$ ; 0.001, 0.05, 0.1, 0.2, 0.3, 0.4, 0.5  
194 and 1.0) were regressed on case-control status using logistic regression, adjusting for the  
195 following covariates: six PCs, genotyping batch, and assessment centre ( $n=128$  variables). We  
196 report p-values at the optimal  $P_T$  for each test of association. To control for multiple testing across  
197  $P_T$  (x8), and across tests of association (autoimmune PRS (x8) predicting any/stringent depression  
198 (x2) in men and women (x2),  $n=32$ ; and MDD PRS predicting possible/probable (x2) autoimmune

199 diseases (x14) in men and women (x2), n=56), a Bonferroni correction was applied to give a p-  
200 value threshold for significance of  $7.1 \times 10^{-5}$  ( $0.05/704$  tests,  $704 = 8 \times (32+56)$ ). Where sex-specific  
201 associations were observed, sensitivity analyses were conducted to account for different sample  
202 sizes between sexes. We tested for interactions between sex and PRS (at the optimal  $P_T$  from sex-  
203 specific tests) in the full sample (Phenotype  $\sim$  sex + PRS + sex\*PRS + covariates). We report  $R^2$   
204 estimates transformed to the liability scale using the following population prevalences for  
205 outcome traits: PA=0.1%<sup>32</sup>, ATD=2%<sup>33</sup>, T1D=0.3%<sup>34</sup>, MS=0.1%<sup>25</sup>, MG=0.02%<sup>35</sup>, coeliac=1%<sup>23</sup>,  
206 IBD=0.5%<sup>24</sup>, psoriasis=2%<sup>36</sup>, AS=0.55%<sup>37</sup>, PR/GCA= 0.85%<sup>38</sup>, PsA=0.5%<sup>28</sup>, RA=1%<sup>39</sup>, SS=0.7%<sup>40</sup>,  
207 SLE=0.1%<sup>41</sup> and MDD=15%<sup>11</sup>.

208 AVENGEME<sup>42</sup> was used to estimate power to detect cross-trait PRS associations, assuming  
209 varying degrees of genetic correlation ( $r_G$ ) between corresponding traits ( $r_G$  0.01 to 0.5). Power  
210 was estimated for cross-trait analyses where summary statistics for both traits were available  
211 (i.e. eight autoimmune disorders and MDD) so that SNP-based heritability (required for power  
212 calculations in AVENGEME) could be estimated using Linkage Disequilibrium Score Regression  
213 (LDSC v1.0.1)<sup>43</sup> (Supplementary Figure 1). Power was estimated using PRS at the optimal  $P_T$   
214 identified in cross-trait association tests, and liberally-defined sample sizes. Parameters used to  
215 estimate power are in Supplementary Tables 1 and 2.

216 LDSC v1.0.1<sup>43</sup> was used to estimate  $r_G$  between the UKB depression phenotypes ('any' and  
217 'stringent') and autoimmune diseases with publicly-available summary statistics. To robustly  
218 apply LDSC, we limited the autoimmune diseases to those with sample sizes above 5k in the

219 primary GWAS (coeliac<sup>23</sup>, IBD<sup>24</sup>, MS<sup>25</sup>, psoriasis<sup>27</sup>, RA<sup>29</sup>, and SLE<sup>30</sup>). To control for multiple testing  
220 across traits, a Bonferroni correction was applied to give a p-value threshold for significance of  
221  $4.1 \times 10^{-3}$  in rG analyses (0.05/12 tests).

## 222 Results

223 A total of 28,479 individuals were identified as possible cases across fourteen autoimmune  
224 diseases, and a sub-set of 16,824 (59.1%) met the stringent criteria for probable cases (refer  
225 Supplementary Material for representation of the overlap between criteria used to define cases).  
226 65,075 individuals met the criteria for any depression, 14,625 of whom met the criteria for  
227 stringent depression. Sociodemographic characteristics for autoimmune and depression cases  
228 and controls are summarised in Table 2. Overall, autoimmune and depression case groups  
229 contained a higher proportion of females, had lower SES, higher smoking prevalence, and higher  
230 BMI than their respective control groups, (N = 324,074 autoimmune controls, N = 232,552  
231 depression controls, all p-values <  $5 \times 10^{-21}$  in pairwise comparisons).

232 Table 2: Sociodemographic information for autoimmune and depression cases and controls. Pop. Prev. = population prevalence estimate. UKB Prev. = prevalence of cases  
 233 in the UKB as a proportion of autoimmune/depression controls. TDI = Townsend Deprivation Index; negative scores indicate less deprivation. SD = standard deviation.

|                                              |                              | Pop. Prev. | Count           | UKB Prev. | Mean age (SD) | Female (%) | TDI (SD)     | Current smoker (%) | Mean BMI (SD)    | Count   | UKB Prev. | Mean age (SD) | Female (%) | TDI (SD)     | Current smoker (%) | Mean BMI (SD) |
|----------------------------------------------|------------------------------|------------|-----------------|-----------|---------------|------------|--------------|--------------------|------------------|---------|-----------|---------------|------------|--------------|--------------------|---------------|
| <b>Autoimmune Diseases (system/disease)</b>  |                              |            | <b>Possible</b> |           |               |            |              |                    | <b>Probable</b>  |         |           |               |            |              |                    |               |
| Blood                                        | Pernicious Anemia            | 0.10%      | 1,555           | 0.48%     | 58.9 (7.61)   | 71%        | -0.85 (3.19) | 13%                | 28.0 (5.55)      | 423     | 0.13%     | 60.1 (7.19)   | 72%        | -0.99 (3.23) | 12%                | 28.5 (5.34)   |
| Endocrine system                             | Autoimmune Thyroid Disease   | 2.00%      | 859             | 0.26%     | 56.8 (7.75)   | 85%        | -1.11 (3.05) | 15%                | 27.4 (5.11)      | 607     | 0.19%     | 57.0 (7.64)   | 86%        | -1.06 (3.03) | 16%                | 27.8 (5.21)   |
|                                              | Type 1 diabetes              | 0.30%      | 2,751           | 0.84%     | 58.3 (7.80)   | 42%        | -0.46 (3.39) | 13%                | 30.1 (6.08)      | 2,292   | 0.70%     | 58.0 (7.85)   | 43%        | -0.50 (3.39) | 12%                | 29.9 (6.07)   |
| Nervous system                               | Multiple Sclerosis           | 0.10%      | 1,683           | 0.52%     | 55.4 (7.52)   | 73%        | -1.45 (3.01) | 16%                | 26.9 (5.08)      | 1,154   | 0.35%     | 55.5 (7.45)   | 73%        | -1.33 (3.06) | 17%                | 26.9 (5.27)   |
|                                              | Myasthenia Gravis            | 0.02%      | 234             | 0.07%     | 59.2 (7.39)   | 56%        | -0.94 (3.27) | 11%                | 29.0 (5.44)      | 147     | 0.05%     | 60.1 (7.09)   | 48%        | -1.06 (3.32) | 12%                | 29.3 (5.18)   |
| Digestive system                             | Coeliac                      | 1.00%      | 2,364           | 0.72%     | 57.8 (7.79)   | 67%        | -1.49 (2.99) | 7%                 | 25.8 (4.57)      | 1,260   | 0.39%     | 58.4 (7.66)   | 68%        | -1.42 (3.03) | 7%                 | 25.8 (4.60)   |
|                                              | Inflammatory Bowel Disease   | 0.50%      | 5,105           | 1.55%     | 57.4 (7.92)   | 51%        | -1.27 (3.10) | 10%                | 27.3 (4.70)      | 3,538   | 1.08%     | 57.3 (7.98)   | 50%        | -1.28 (3.07) | 9%                 | 27.2 (4.63)   |
| Skin                                         | Psoriasis                    | 2.00%      | 5,459           | 1.66%     | 56.8 (8.01)   | 46%        | -1.05 (3.22) | 15%                | 28.4 (5.17)      | 2,759   | 0.84%     | 57.1 (8.04)   | 42%        | -0.90 (3.28) | 16%                | 28.7 (5.26)   |
| Musculoskeletal system and connective tissue | Ankylosing Spondylitis       | 0.55%      | 1,344           | 0.41%     | 57.9 (7.47)   | 38%        | -1.02 (3.21) | 13%                | 27.8 (4.80)      | 413     | 0.13%     | 57.4 (7.57)   | 26%        | -1.06 (3.22) | 12%                | 27.9 (4.85)   |
|                                              | Polymyalgia Rheumatica/GCA   | 0.85%      | 1,627           | 0.50%     | 63.1 (5.16)   | 67%        | -1.70 (2.79) | 9%                 | 28.3 (5.08)      | 898     | 0.28%     | 63.7 (4.58)   | 68%        | -1.67 (2.75) | 9%                 | 28.4 (5.24)   |
|                                              | Psoriatic Arthritis          | 0.50%      | 1,107           | 0.34%     | 56.6 (7.48)   | 50%        | -1.16 (3.18) | 11%                | 29.0 (5.43)      | 779     | 0.24%     | 56.6 (7.52)   | 51%        | -1.06 (3.23) | 11%                | 29.3 (5.59)   |
|                                              | Rheumatoid Arthritis         | 1.00%      | 6,360           | 1.92%     | 59.5 (7.06)   | 67%        | -0.91 (3.29) | 13%                | 28.5 (5.53)      | 3,451   | 1.05%     | 59.6 (7.01)   | 70%        | -1.08 (3.18) | 12%                | 28.2 (5.50)   |
|                                              | Sjögren Syndrome             | 0.70%      | 647             | 0.20%     | 59.3 (7.10)   | 90%        | -1.20 (3.03) | 6%                 | 27.1 (5.72)      | 389     | 0.12%     | 59.2 (7.26)   | 89%        | -1.19 (3.10) | 7%                 | 27.0 (5.55)   |
|                                              | Systemic Lupus Erythematosus | 0.10%      | 624             | 0.19%     | 56.7 (8.18)   | 84%        | -1.02 (3.21) | 14%                | 27.3 (5.65)      | 362     | 0.11%     | 56.6 (8.00)   | 86%        | -0.99 (3.15) | 14%                | 27.3 (5.82)   |
| <b>Any Autoimmune Disease</b>                |                              | NA         | 28,479          | 8.08%     | 58.1 (7.73)   | 58%        | -1.11 (3.17) | 12%                | 27.9 (5.28)      | 16,824  | 4.94%     | 58.1 (7.73)   | 57%        | -1.10 (3.17) | 12%                | 28.0 (5.34)   |
| <i>Autoimmune Controls</i>                   |                              | NA         | 324,074         | NA        | 56.4 (8.06)   | 52%        | -1.50 (2.98) | 10%                | 27.2 (4.64)      | 324,074 | NA        | 56.4 (8.06)   | 52%        | -1.50 (2.98) | 10%                | 27.2 (4.64)   |
| <b>Depression</b>                            |                              |            | <b>Any</b>      |           |               |            |              |                    | <b>Stringent</b> |         |           |               |            |              |                    |               |
| <b>Depression</b>                            |                              | 15%        | 65,075          | 21.86%    | 55.4 (7.86)   | 67%        | -1.09 (3.14) | 13%                | 27.8 (5.32)      | 14,625  | 5.92%     | 56.1 (7.88)   | 67%        | -0.58 (3.35) | 19%                | 28.9 (5.77)   |
| <i>Depression Controls</i>                   |                              | NA         | 232,552         | NA        | 57.1 (8.10)   | 47%        | -1.65 (2.89) | 9%                 | 27.2 (4.53)      | 232,552 | NA        | 57.1 (8.10)   | 47%        | -1.65 (2.89) | 9%                 | 27.2 (4.53)   |

234



235 The prevalence of any depression was significantly higher in autoimmune cases compared to  
 236 autoimmune controls ( $p = 6 \times 10^{-177}$  for possible cases of any autoimmune disease versus controls,  $p =$   
 237  $2 \times 10^{-124}$  for probable cases of any autoimmune disease versus controls). The prevalence of stringent  
 238 depression was significantly higher in autoimmune cases compared to autoimmune controls ( $p = 3 \times 10^{-$   
 239  $207$  for possible cases of any autoimmune disease versus controls,  $p = 6 \times 10^{-163}$  for probable cases of any  
 240 autoimmune disease versus controls) (Table 3).

241 Table 3: Prevalence of depression within autoimmune cases compared to autoimmune controls, stratified by  
 242 possible/probable for autoimmune diseases, and any/stringent for depression cases. P-values from pairwise  
 243 comparisons of depression prevalence in autoimmune cases compared to autoimmune controls are shown in brackets.

| Autoimmune Trait                             |                              | Depression prevalence in autoimmune traits     |                                                |                                                |                                                |
|----------------------------------------------|------------------------------|------------------------------------------------|------------------------------------------------|------------------------------------------------|------------------------------------------------|
|                                              |                              | Any depression prevalence                      |                                                | Stringent depression prevalence                |                                                |
|                                              |                              | Possible Autoimmune                            | Probable Autoimmune                            | Possible Autoimmune                            | Probable Autoimmune                            |
| <b>Autoimmune Controls</b>                   |                              | <b>20.6%</b>                                   |                                                | <b>5.1%</b>                                    |                                                |
| <b>Any Autoimmune Disease</b>                |                              | <b>28.9% (<math>6 \times 10^{-177}</math>)</b> | <b>29.5% (<math>2 \times 10^{-124}</math>)</b> | <b>10.8% (<math>3 \times 10^{-207}</math>)</b> | <b>11.5% (<math>6 \times 10^{-163}</math>)</b> |
| Blood                                        | Pernicious Anemia            | 35.8% ( $4 \times 10^{-36}$ )                  | 33.7% ( $4 \times 10^{-8}$ )                   | 15.2% ( $1 \times 10^{-39}$ )                  | 16.6% ( $4 \times 10^{-15}$ )                  |
| Endocrine system                             | Autoimmune Thyroid Disease   | 35.1% ( $6 \times 10^{-19}$ )                  | 34.7% ( $6 \times 10^{-13}$ )                  | 13.7% ( $1 \times 10^{-16}$ )                  | 13.4% ( $3 \times 10^{-11}$ )                  |
|                                              | Type 1 diabetes              | 31.1% ( $3 \times 10^{-31}$ )                  | 31.3% ( $1 \times 10^{-27}$ )                  | 14.1% ( $5 \times 10^{-59}$ )                  | 13.5% ( $5 \times 10^{-43}$ )                  |
| Nervous System                               | Multiple Sclerosis           | 39.3% ( $6 \times 10^{-56}$ )                  | 42.5% ( $3 \times 10^{-51}$ )                  | 16.9% ( $5 \times 10^{-54}$ )                  | 20.0% ( $8 \times 10^{-57}$ )                  |
|                                              | Myasthenia Gravis            | 33.3% ( $5 \times 10^{-5}$ )                   | 29.2% ( $3 \times 10^{-2}$ )                   | 14.1% ( $5 \times 10^{-6}$ )                   | 14.8% ( $4 \times 10^{-5}$ )                   |
| Digestive system                             | Coeliac                      | 27.3% ( $3 \times 10^{-12}$ )                  | 29.8% ( $2 \times 10^{-12}$ )                  | 8.4% ( $4 \times 10^{-8}$ )                    | 9.5% ( $7 \times 10^{-8}$ )                    |
|                                              | Inflammatory Bowel Disease   | 24.9% ( $6 \times 10^{-11}$ )                  | 24.9% ( $3 \times 10^{-8}$ )                   | 8.9% ( $8 \times 10^{-22}$ )                   | 9.1% ( $2 \times 10^{-17}$ )                   |
| Skin                                         | Psoriasis                    | 26.8% ( $2 \times 10^{-22}$ )                  | 28.3% ( $1 \times 10^{-17}$ )                  | 8.7% ( $4 \times 10^{-20}$ )                   | 9.9% ( $4 \times 10^{-18}$ )                   |
| Musculoskeletal system and connective tissue | Ankylosing Spondylitis       | 26.9% ( $5 \times 10^{-7}$ )                   | 28.4% ( $5 \times 10^{-4}$ )                   | 9.6% ( $7 \times 10^{-9}$ )                    | 10.5% ( $9 \times 10^{-5}$ )                   |
|                                              | Polymyalgia Rheumatica/GCA   | 29.3% ( $2 \times 10^{-13}$ )                  | 27.8% ( $5 \times 10^{-6}$ )                   | 10.8% ( $3 \times 10^{-15}$ )                  | 10.6% ( $1 \times 10^{-8}$ )                   |
|                                              | Psoriatic Arthritis          | 31.8% ( $3 \times 10^{-15}$ )                  | 34.3% ( $5 \times 10^{-16}$ )                  | 10.2% ( $1 \times 10^{-8}$ )                   | 13.0% ( $2 \times 10^{-13}$ )                  |
|                                              | Rheumatoid Arthritis         | 30.6% ( $5 \times 10^{-62}$ )                  | 29.4% ( $6 \times 10^{-28}$ )                  | 12.7% ( $3 \times 10^{-92}$ )                  | 12.1% ( $1 \times 10^{-45}$ )                  |
|                                              | Sjögren Syndrome             | 40.7% ( $4 \times 10^{-25}$ )                  | 41.9% ( $1 \times 10^{-17}$ )                  | 18.9% ( $2 \times 10^{-28}$ )                  | 18.9% ( $7 \times 10^{-18}$ )                  |
|                                              | Systemic Lupus Erythematosus | 40.2% ( $2 \times 10^{-25}$ )                  | 44.5% ( $2 \times 10^{-22}$ )                  | 18.8% ( $6 \times 10^{-30}$ )                  | 22.2% ( $8 \times 10^{-27}$ )                  |

244 The prevalence of possible cases of any autoimmune disease was significantly higher in depression cases  
 245 compared to depression controls ( $p = 6 \times 10^{-177}$  for any depression versus controls,  $p = 3 \times 10^{-207}$  for  
 246 stringent depression versus controls). The prevalence of probable cases of any autoimmune disease was  
 247 significantly higher in depression cases compared to depression controls ( $p = 2 \times 10^{-124}$  for any depression  
 248 versus controls,  $p = 6 \times 10^{-163}$  for stringent depression versus controls) (Table 4).

249 Table 4: Prevalence of autoimmune diseases within depression cases compared to depression controls, stratified by  
 250 possible/probable for autoimmune diseases, and stringent/any for depression cases. P-values from pairwise  
 251 comparisons of autoimmune prevalence in depression cases compared to depression controls are shown in brackets.

|                                              |                              | Autoimmune prevalence in depression    |                                        |                     |                                       |                                       |                     |
|----------------------------------------------|------------------------------|----------------------------------------|----------------------------------------|---------------------|---------------------------------------|---------------------------------------|---------------------|
|                                              |                              | Possible autoimmune prevalence         |                                        |                     | Probable autoimmune prevalence        |                                       |                     |
| Autoimmune Trait                             |                              | Any Depression                         | Stringent Depression                   | Depression Controls | Any Depression                        | Stringent Depression                  | Depression Controls |
| <b>Any Autoimmune Disease</b>                |                              | <b>10.48%</b> ( $6 \times 10^{-177}$ ) | <b>14.27%</b> ( $3 \times 10^{-207}$ ) | <b>6.94%</b>        | <b>6.59%</b> ( $2 \times 10^{-124}$ ) | <b>9.48%</b> ( $6 \times 10^{-163}$ ) | <b>4.19%</b>        |
| Blood                                        | Pernicious Anemia            | 0.77% ( $4 \times 10^{-36}$ )          | 1.17% ( $1 \times 10^{-39}$ )          | 0.36%               | 0.19% ( $4 \times 10^{-8}$ )          | 0.35% ( $4 \times 10^{-15}$ )         | 0.10%               |
| Endocrine system                             | Autoimmune Thyroid Disease   | 0.41% ( $6 \times 10^{-19}$ )          | 0.58% ( $1 \times 10^{-16}$ )          | 0.20%               | 0.28% ( $6 \times 10^{-13}$ )         | 0.39% ( $3 \times 10^{-11}$ )         | 0.14%               |
|                                              | Type 1 diabetes              | 1.20% ( $3 \times 10^{-31}$ )          | 2.07% ( $5 \times 10^{-59}$ )          | 0.69%               | 1.02% ( $1 \times 10^{-27}$ )         | 1.65% ( $5 \times 10^{-43}$ )         | 0.58%               |
| Nervous System                               | Multiple Sclerosis           | 0.87% ( $6 \times 10^{-56}$ )          | 1.31% ( $5 \times 10^{-54}$ )          | 0.35%               | 0.63% ( $3 \times 10^{-51}$ )         | 1.02% ( $8 \times 10^{-57}$ )         | 0.22%               |
|                                              | Myasthenia Gravis            | 0.11% ( $5 \times 10^{-5}$ )           | 0.17% ( $5 \times 10^{-6}$ )           | 0.05%               | 0.06% ( $3 \times 10^{-2}$ )          | 0.12% ( $4 \times 10^{-5}$ )          | 0.04%               |
| Digestive system                             | Coeliac                      | 0.92% ( $3 \times 10^{-12}$ )          | 1.08% ( $4 \times 10^{-8}$ )           | 0.64%               | 0.54% ( $2 \times 10^{-12}$ )         | 0.64% ( $7 \times 10^{-8}$ )          | 0.33%               |
|                                              | Inflammatory Bowel Disease   | 1.82% ( $6 \times 10^{-11}$ )          | 2.56% ( $8 \times 10^{-22}$ )          | 1.43%               | 1.28% ( $3 \times 10^{-8}$ )          | 1.85% ( $2 \times 10^{-17}$ )         | 1.00%               |
| Skin                                         | Psoriasis                    | 2.05% ( $2 \times 10^{-22}$ )          | 2.55% ( $4 \times 10^{-20}$ )          | 1.46%               | 1.10% ( $1 \times 10^{-17}$ )         | 1.47% ( $4 \times 10^{-18}$ )         | 0.73%               |
| Musculoskeletal system and connective tissue | Ankylosing Spondylitis       | 0.52% ( $5 \times 10^{-7}$ )           | 0.72% ( $7 \times 10^{-9}$ )           | 0.37%               | 0.17% ( $5 \times 10^{-4}$ )          | 0.25% ( $9 \times 10^{-5}$ )          | 0.11%               |
|                                              | Polymyalgia Rheumatica/GCA   | 0.66% ( $2 \times 10^{-13}$ )          | 0.93% ( $3 \times 10^{-15}$ )          | 0.42%               | 0.35% ( $5 \times 10^{-6}$ )          | 0.51% ( $1 \times 10^{-8}$ )          | 0.23%               |
|                                              | Psoriatic Arthritis          | 0.50% ( $3 \times 10^{-15}$ )          | 0.58% ( $1 \times 10^{-8}$ )           | 0.28%               | 0.38% ( $5 \times 10^{-16}$ )         | 0.51% ( $2 \times 10^{-13}$ )         | 0.19%               |
|                                              | Rheumatoid Arthritis         | 2.66% ( $5 \times 10^{-62}$ )          | 4.14% ( $3 \times 10^{-92}$ )          | 1.59%               | 1.42% ( $6 \times 10^{-28}$ )         | 2.23% ( $1 \times 10^{-45}$ )         | 0.89%               |
|                                              | Sjögren Syndrome             | 0.34% ( $4 \times 10^{-25}$ )          | 0.55% ( $2 \times 10^{-28}$ )          | 0.13%               | 0.21% ( $1 \times 10^{-17}$ )         | 0.33% ( $7 \times 10^{-18}$ )         | 0.08%               |
|                                              | Systemic Lupus Erythematosus | 0.36% ( $2 \times 10^{-25}$ )          | 0.59% ( $6 \times 10^{-30}$ )          | 0.14%               | 0.23% ( $2 \times 10^{-22}$ )         | 0.39% ( $8 \times 10^{-27}$ )         | 0.08%               |

252

253 Testing for same-trait PRS associations, PRS for MDD were significantly associated with any depression  
 254 case-status ( $p < 5 \times 10^{-324}$ ,  $R^2 = 1.48\%$ ) and stringent depression case-status ( $p = 2 \times 10^{-228}$ ,  $R^2 = 2.23\%$ ). PRS  
 255 for autoimmune diseases were significantly associated with both possible and probable case-control  
 256 status for the corresponding diseases (Figure 2). The variance in liability,  $R^2$ , explained by PRS was higher  
 257 in strictly-defined compared to liberally-defined phenotypes. Most results were highly significant ( $p <$   
 258  $6 \times 10^{-29}$ ), except myasthenia gravis ( $p < 7 \times 10^{-3}$ ), which has the smallest sample size of 234 cases, and  
 259 psoriatic arthritis ( $p < 3 \times 10^{-6}$ ) where the discovery GWAS has only 1430 cases.

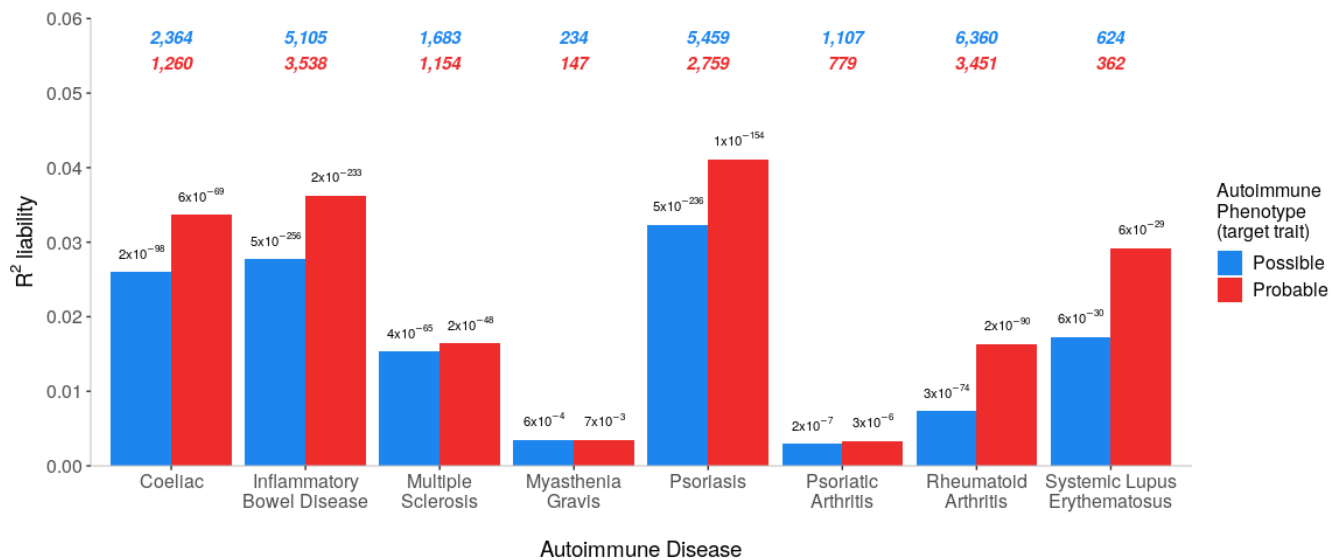

260

261 Figure 2: Variances in autoimmune liability explained by PRS for the corresponding autoimmune diseases. The number  
 262 of cases are shown at the top of the plot (possible = blue, probable = red). P-values are shown atop each bar.

263

264 Power analyses showed that, in the prediction of any depression from autoimmune PRS, there was 80%  
 265 power to detect associations assuming modest levels of underlying genetic correlation ( $r_G$ );  $r_G < 0.05$  for  
 266 coeliac, MS, psoriasis, and SLE;  $r_G < 0.1$  for IBD, PsA and RA; and  $r_G < 0.17$  for MG (Supplementary Figure

267 2). In the prediction of possible autoimmune diseases from depression PRS, there was 80% power to  
 268 detect associations assuming  $r_G < 0.05$  for coeliac and IBD;  $r_G < 0.1$  for psoriasis and RA; and  $r_G < 0.15$   
 269 for PsA and SLE. There were two exceptions; MS and MG, where the underlying  $r_G$  would need to  
 270 approach  $\sim 0.3$  to achieve 80% power (Supplementary Figure 3).

271 In the prediction of depression from autoimmune PRS (Figure 3), PRS for myasthenia gravis were  
 272 significantly associated with case-status for any depression ( $p = 5.2 \times 10^{-5}$ ,  $R^2 = 0.01\%$ ) and stringent  
 273 depression ( $p = 1.6 \times 10^{-5}$ ,  $R^2 = 0.04\%$ ). PRS for psoriasis were significantly associated with case-status for  
 274 any depression ( $p = 8.7 \times 10^{-6}$ ,  $R^2 = 0.01\%$ ). No other autoimmune disease PRS predicted depression case-  
 275 control status, and no sex-specific analyses met the Bonferroni-corrected threshold. The  $R^2$  values for  
 276 variance explained in depression by autoimmune PRS are all very low, at  $< 0.1\%$ , and substantially lower  
 277 than the  $R^2$  for autoimmune diseases (Figure 2).

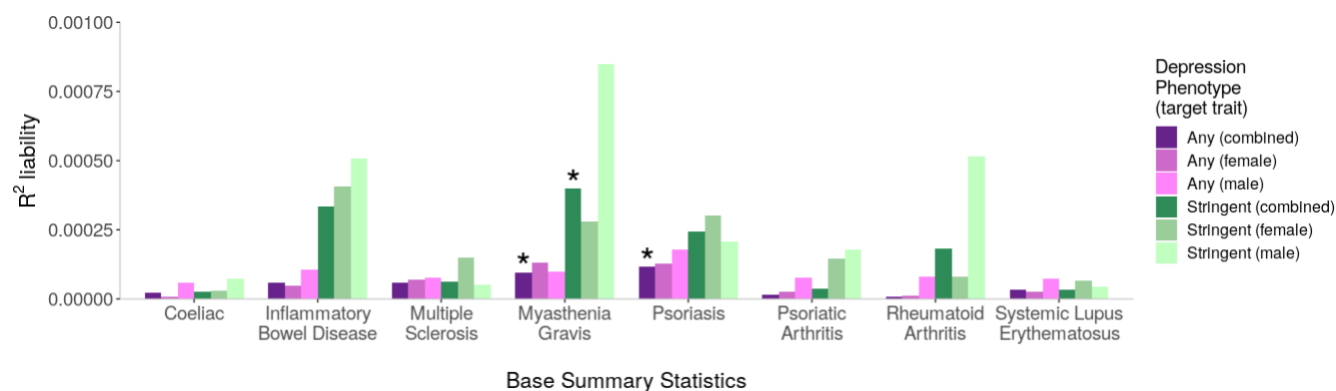

278

279 Figure 3: Variances in depression liability explained by PRS for autoimmune diseases (x-axis). Asterisks denote  
 280 associations with  $p$ -values  $< 7.1 \times 10^{-5}$ , meeting Bonferroni correction. Number of cases for depression phenotypes: Any  
 281 (combined) = 65,075; Any (female) = 43,413; Any (male) = 21,662; Stringent (combined) = 14,625; Stringent (female) =  
 282 9,738; Stringent (male) = 4,887.

283

284 In the prediction of autoimmune diseases from depression PRS, genetic liability for MDD was  
285 significantly associated with six autoimmune diseases: coeliac, inflammatory bowel disease, psoriasis,  
286 psoriatic arthritis, rheumatoid arthritis, and type 1 diabetes (all p-values <  $5.8 \times 10^{-5}$ ,  $R^2$  range between  
287 0.06% and 0.27%) (Figure 4). For three, the association with MDD was observed in probable and possible  
288 cases (psoriasis, rheumatoid arthritis and type 1 diabetes). For coeliac and inflammatory bowel disease,  
289 the association was only in possible cases. For psoriatic arthritis, the association was only in probable  
290 cases. For all significant associations, higher PRS increased risk for the outcome phenotype, except for  
291 coeliac, where higher MDD PRS was associated with reduced risk ( $p = 6 \times 10^{-8}$ ,  $R^2 = 0.17\%$ ,  $\beta = -0.11$ , SE  
292 = 0.02, in the combined sample).

293 In the prediction of autoimmune diseases from depression PRS, sex-specific associations were observed,  
294 primarily in female autoimmune cases (coeliac, inflammatory bowel disease, type 1 diabetes and  
295 rheumatoid arthritis, all  $p < 4.5 \times 10^{-5}$ ). Association in males was observed in psoriasis (possible cases,  $p =$   
296  $5.8 \times 10^{-5}$ ), and in rheumatoid arthritis (possible cases,  $p = 1.6 \times 10^{-5}$ ). The most consistent results were  
297 observed in rheumatoid arthritis, where the sample size was largest, with five of the six analyses reaching  
298 Bonferroni threshold (all  $p < 4.5 \times 10^{-5}$ ,  $R^2$  range between 0.07% and 0.1%). However, there was no  
299 evidence for a significant interaction between sex and PRS in the combined samples of men and women  
300 (all  $p > 0.02$ ), indicating that sex-specific associations were generally influenced by sample size.

301 Full results of each test are shown in Supplementary Tables 3 to 6 and Supplementary Figures 4 to 7.

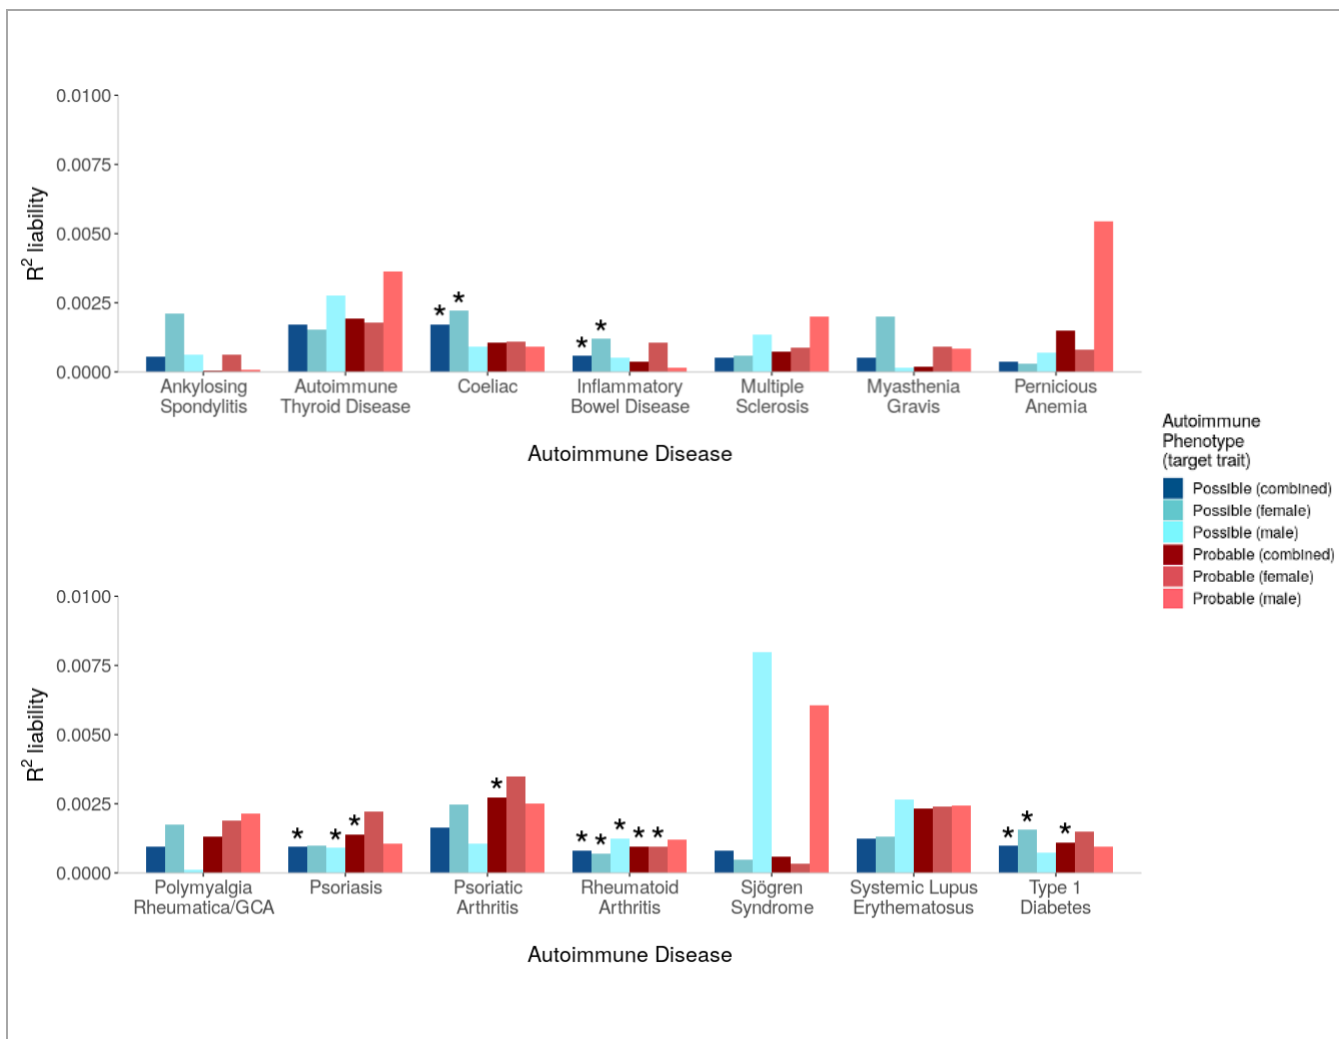

302

303 Figure 4: Variances in autoimmune liability (x-axes) explained by PRS for MDD. Asterisks denote associations with p-  
 304 values < 7.1x10<sup>-5</sup>, meeting Bonferroni correction. Number of cases for the autoimmune diseases are given in Table 2.

305

306 Significant genetic correlations (rG) were observed between inflammatory bowel disease and any  
 307 depression (rG = 0.11, 95% CI = 0.03 - 0.18, p = 3.8x10<sup>-3</sup>) and stringent depression (rG = 0.16, 95% CI =  
 308 0.07 - 0.24, p = 3.0x10<sup>-4</sup>); and between psoriasis and stringent depression (rG = 0.16, 95% CI = 0.06 - 0.26,

309  $p = 1.1 \times 10^{-3}$ ). No other traits met the Bonferroni-corrected threshold for significance in rG analyses  
310 (Supplementary Table 7).

## 311 Discussion

312 Motivated by epidemiological findings of a bi-directional relationship between depression and  
313 autoimmune diseases, we tested for evidence of pleiotropy between traits, adopting both liberal and  
314 strict phenotyping to define cases in the UKB. We showed modest association of PRS from autoimmune  
315 diseases with MDD, and slightly stronger associations of MDD PRS with autoimmune diseases. These  
316 observations suggest only a minor component of observed comorbidity is due to shared genetics  
317 between depression and autoimmune diseases.

318 We made three key observations: 1) Phenotypic variance explained by PRS for corresponding traits was  
319 higher in strictly-defined than liberally-defined cases, indicating more rigorous phenotyping improved  
320 the validity of autoimmune and depression cases; 2) The phenotypic overlap between depression and  
321 autoimmune diseases was consistent with the literature – depression was more common in individuals  
322 with autoimmune diseases, and vice-versa; 3) Cross-trait PRS analyses identified significant associations  
323 between depression and some autoimmune diseases, but with effect sizes indicating the existence of a  
324 shared biological component of modest effect on the observed comorbidity.

325 Our phenotyping approach used both strictly-defined and liberally-defined cases, integrating the  
326 multiple sources of UKB data. PRS for eight autoimmune diseases predicted case-control status,  
327 increasing confidence in the robustness of case definition. The phenotypic variance explained was higher  
328 in strictly-defined cases, potentially reflecting greater specificity; identifying individuals with multiple  
329 endorsements for a disease reduces the probability of misclassifying controls as cases. Conversely, the



330 criteria for liberally-defined cases increases sample size, but may induce misclassification of controls as  
331 cases.

332 For each of the autoimmune diseases considered, cases had higher frequencies of depression than  
333 controls, recapitulating the effect observed in epidemiological studies. Similarly, the prevalence of each  
334 autoimmune disease was significantly higher in depression cases compared to controls. Prevalence  
335 estimates reported here are cross-sectional, and we lack information on the temporal relationship  
336 between traits.

337 Cross-trait PRS analyses identified significant associations, although observed effect sizes were small,  
338 ranging between  $R^2 = 0.01\%$  and  $0.27\%$ . Compared with the substantially higher phenotypic variance  
339 explained by PRS for autoimmune diseases in corresponding traits, the small effect sizes observed in  
340 cross-trait PRS analyses provide a useful contrast, indicating only a small contribution of shared genetic  
341 influences in the observed comorbidities. However, this was not universally true – MDD PRS captured  
342 nearly the same amount of variance in probable psoriatic arthritis ( $0.27\%$ ) as the PRS for psoriatic  
343 arthritis ( $0.29\%$ ). For all significant associations, higher PRS increased risk for the outcome phenotype.  
344 Interestingly, there was one exception, where higher MDD PRS was associated with reduced risk for  
345 coeliac disease. This is intriguing given the positive phenotypic correlation between depression and  
346 coeliac disease and may warrant further investigation.

347 For three traits, we observed significant associations in liberally-defined, but not strictly-defined cases  
348 (psoriasis PRS was associated with any depression, MDD PRS was associated with possible coeliac and  
349 inflammatory bowel disease). In contrast, MDD PRS was associated with probable, but not possible,

350 psoriatic arthritis, suggesting misclassification in possible cases. Misclassification bias may vary across  
351 diseases; some autoimmune diseases may be more prone to misclassification with other autoimmune  
352 diseases, whilst other diagnoses may misclassify with non-inflammatory conditions. For example,  
353 osteoarthritis (non-inflammatory) may misclassify as psoriatic arthritis in the absence of multiple-item  
354 endorsement to increase diagnosis validity.

355 Cross-trait PRS analyses identified some sex-dependent associations. MDD PRS were associated with  
356 psoriasis in males, and MDD PRS were associated with coeliac, inflammatory bowel disease and type 1  
357 diabetes in females. However, sensitivity analyses revealed no evidence for significant interactions  
358 between PRS and sex in the combined sample, indicating that sex-dependent associations were generally  
359 driven by different sample sizes in sex-stratified analyses. Rheumatoid arthritis was the most common  
360 autoimmune disease and showed the most consistency in cross-trait associations; MDD PRS were  
361 significantly associated with rheumatoid arthritis in all case groups, except probable males. This is in  
362 contrast with Euesden, et al.<sup>10</sup>, found no evidence for association between PRS for depression and risk  
363 for rheumatoid arthritis, but in a substantially smaller sample of 226 cases. Liu, et al.<sup>6</sup> also found no  
364 evidence for association between a composite mental health disorder PRS and risk for autoimmune  
365 diseases, but also in a smaller sample of 1,383 individuals with any of seven autoimmune diseases. A  
366 composite PRS for autoimmune diseases did show weak association with case-control status in a sample  
367 of 43,902 individuals with any of six mental health disorders in the Liu, et al.<sup>6</sup> study. This highlights the  
368 importance of sample size, and our study benefits from the scale of the UKB, where power calculations  
369 indicated our investigation was able to detect modest pleiotropic effects.

370 In contrast to the small, but significant, cross-trait PRS associations observed between depression and  
371 several autoimmune diseases, we only observed significant genetic correlations between depression and  
372 two autoimmune diseases: inflammatory bowel disease and psoriasis. The PRS methodology, which  
373 exploits the use of individual-level data, may have increased power to detect weak genetic effects  
374 compared to LDSC, which uses only summary statistics.

375 The weak genetic contribution suggests that another mechanism may be driving or contributing to the  
376 bi-directional relationship between autoimmune diseases and depression<sup>44</sup>. Inflammatory factors  
377 underlying some cases of depression could provide a common biological pathogenesis with autoimmune  
378 diseases. Lynall, et al.<sup>45</sup> observed increased immune cell counts in depression cases compared to  
379 controls, and identified a sub-group of cases with elevated inflammatory markers who presented with  
380 more severe depression than uninflamed cases. Environmental risk factors such as BMI and childhood  
381 maltreatment increase risk of both depression and autoimmune diseases and would contribute to the  
382 bi-directional effect<sup>46,47</sup>. Similarly, some treatments for depression (antidepressants) and autoimmune  
383 diseases (steroids) are obesogenic and may increase comorbidity. Diagnosis with autoimmune disease  
384 increases risk of depression due to psychological factors in adjusting to a chronic disorder and changes  
385 in behaviour such as reduced exercise. Health related behaviours that are elevated in depression  
386 (smoking, poor diet and reduced physical activity) increase risk for autoimmune diseases. These  
387 mechanisms may not be independent of joint genetic contributors. For example, shared inflammatory  
388 mechanisms would lead to horizontal pleiotropy, where genetic variants directly affect both disorders,  
389 and vertical pleiotropy can arise through environmental risk factors where genetic variation influences  
390 one trait through mediation on another trait. The mechanisms underpinning the observed cross-trait

391 PRS associations may warrant further investigation, potentially using Mendelian Randomization to  
392 investigate whether MDD risk alleles have a causal effect on autoimmune diseases, and vice versa. It is  
393 also interesting to speculate that associations could be driven by ‘phenotypic hitchhiking’, in which a  
394 GWAS for one trait (e.g. MDD) ascertains patients with comorbid diseases (e.g. autoimmune), potentially  
395 inducing cross-trait correlations. Disentangling pleiotropy from ‘phenotypic hitchhiking’ may warrant  
396 further investigation.

### 397 [Limitations](#)

398 A healthy volunteer bias has been observed in the UKB<sup>48</sup>, and is a noted limitation of the study. However,  
399 it has been proposed that this bias may attenuate, but not invalidate, exposure-outcome relationships<sup>49</sup>.

400 A further limitation of the ability to extrapolate our results is the lack of representation in individuals of  
401 diverse ancestries. The literature has demonstrated attenuation in PRS analyses where training and  
402 target samples are drawn from different ancestral populations<sup>50</sup>, highlighting the need to perform GWAS  
403 in diverse ancestries. This limitation may have broader implications than would otherwise be the case  
404 for some conditions, such as SLE, which disproportionately affect individuals of African and Asian  
405 ancestry.

406 Although every effort has been made to address the potential for misclassification bias through the  
407 criteria for multiple-item endorsements in strictly-defined cases, the approach remains imperfect. For  
408 example, limited sample size led to us combine Thyroiditis and Grave’s disease, which have opposing  
409 thyroid function, under the broader classification of autoimmune thyroid disease.

410 Despite the scale of the UKB, power calculations showed that for some rare autoimmune diseases, larger  
411 samples would be required to reject the presence of a weak genetic correlation with depression. We  
412 also observed low SNP-based heritability using published summary statistics for multiple sclerosis, which  
413 reduced power to detect pleiotropic effects. The Bonferroni correction applied to cross-trait PRS  
414 analyses was conservative since the eight PRS p-value thresholds included in each test of association are  
415 correlated, although it is difficult to determine the appropriate correction and we chose to be strict  
416 rather than liberal.

## 417 Conclusions

418 We identified cases and controls for depression and fourteen autoimmune diseases in the UKB, using  
419 both strict and liberal phenotyping. PRS analyses indicated that strict phenotyping improved the validity  
420 of cases, demonstrating that multiple UKB variables can be leveraged to increase specificity. Consistent  
421 with the literature, we found that depression was enriched in autoimmune cases, and vice-versa. Despite  
422 having power to detect subtle pleiotropic effects, we found little evidence that shared genetic factors  
423 have a meaningful influence on the observed co-occurrence of depression and autoimmune diseases in  
424 the UK Biobank. The limited shared genetic component will make only a modest contribution to the bi-  
425 directional disease risks, and shared environmental factors, including health-related characteristics and  
426 stressful life events, may be important. Future studies leveraging phenotypic, genetic, diagnostic,  
427 treatment and environmental risk factors may be necessary to unpick the mechanisms contributing to  
428 shared risks for autoimmune diseases and depression. In particular, future research should consider the

429 psychological impacts of autoimmune disease while remaining cognizant of the need to consider and  
430 treat the two diseases in parallel.

## 431 Funding

432 This work was supported by the UK Medical Research Council (PhD studentship to KPG; grant  
433 MR/N015746/1). This paper represents independent research part-funded by the National Institute for  
434 Health Research (NIHR) Biomedical Research Centre at South London and Maudsley NHS Foundation  
435 Trust and King's College London. The views expressed are those of the authors and not necessarily those  
436 of the NHS, the NIHR or the Department of Health and Social Care.

## 437 Acknowledgements

438 We thank participants and scientists involved in making the UK Biobank resource available  
439 (<http://www.ukbiobank.ac.uk/>). The UKB received ethical approval from the North West - Haydock  
440 Research Ethics Committee (reference 16/NW/0274). This study was conducted under application  
441 number 18177. We thank the research participants and employees of 23andMe for making this work  
442 possible. The MDD GWAS summary statistics results from 23andMe were available through a Data  
443 Transfer Agreement between 23andMe, Inc., and King's College, London. Only summary statistics were  
444 shared with no individual level data. 23andMe participants provided informed consent and participated  
445 in the research online. The 23andMe protocol was approved by an external Association for the  
446 Accreditation of Human Research Protection Programs accredited Institutional Review Board, Ethical  
447 and Independent Review Services. Participants were included in the analysis on the basis of consent  
448 status as checked at the time data analyses were initiated. Statistical analyses were carried out on the  
449 King's Health Partners High Performance Compute Cluster funded with capital equipment grants from  
450 the GSTT Charity (TR130505) and Maudsley Charity (980). We thank Nick Dand, Satveer Mahil and

451 Catherine Smith of King's College London for their contribution in identifying medications used in the  
452 treatment of Psoriasis in the UKB.

### 453 [Data Code and Availability](#)

454 Available from UK Biobank subject to standard procedures ([www.ukbiobank.ac.uk](http://www.ukbiobank.ac.uk)). The full GWAS  
455 summary statistics for the 23andMe discovery data set will be made available through 23andMe to  
456 qualified researchers under an agreement with 23andMe that protects the privacy of the 23andMe  
457 participants. Please visit <https://research.23andme.com/collaborate/#publication> for more information  
458 and to apply to access the data.

459 The code used during this study are available at GitHub:  
460 [https://github.com/kglanville/pleiotropy\\_autoimmune\\_depression\\_ukb](https://github.com/kglanville/pleiotropy_autoimmune_depression_ukb).

### 461 [Author contributions](#)

462 Conceptualisation and study design: KPG, CML, JG, PFO. Analysis and manuscript: KPG. Analytical  
463 consultation and interpretation: CML, JG, PFO, JRIC. UKB data curation and management: JRIC, KPG.  
464 Genetic data preparation: JRIC, KPG. Project supervisors: CML, JG, PFO. All authors critically edited the  
465 paper.

### 466 [Declaration of Interest](#)

467 CML is a member of the SAB for Myriad Neuroscience. The remaining authors declare no competing  
468 interests.



## 469 References

- 470 1. Benros ME, Waltoft BL, Nordentoft M, Ostergaard SD, Eaton WW, Krogh J, et al.  
471 Autoimmune Diseases and Severe Infections as Risk Factors for Mood Disorders A  
472 Nationwide Study. *JAMA Psychiatry*. American Medical Association; 2013  
473 Aug;70(8):812–20.
- 474 2. Anderson RJ, Freedberg KA, Clouse RE, Lustman PJ. The Prevalence of Comorbid  
475 Depression in Adults With Diabetes. *Diabetes Care*. 2001 Jun;24(6):1069–78.
- 476 3. Patten SB, Beck CA, Williams JVA, Barbui C, Metz LM. Major depression in multiple  
477 sclerosis: A population-based perspective. *Neurology*. 61st ed. 2003 Dec;:1524–7.
- 478 4. Kurina L, Goldacre M, Yeates D, Gill L. Depression and anxiety in people with  
479 inflammatory bowel disease. *Journal of Epidemiology and Community Health*. BMJ  
480 Publishing Group; 2001 Oct 1;55(10):716–20.
- 481 5. Andersson NW, Gustafsson LN, Okkels N, Taha F, Cole SW, Munk-Jorgensen P, et al.  
482 Depression and the risk of autoimmune disease: a nationally representative, prospective  
483 longitudinal study. *Psychol Med*. Cambridge University Press; 2015 Dec;45(16):3559–  
484 69.
- 485 6. Liu X, Nudel R, Thompson WK, Appadurai V, Schork AJ, Buil A, et al. Genetic factors  
486 underlying the bidirectional relationship between autoimmune and mental disorders –  
487 findings from a Danish population-based study. *Brain, Behavior, and Immunity*.  
488 Academic Press; 2020 Jun 11.
- 489 7. Glanville KP, Coleman JRI, Hanscombe KB, Euesden J, Choi SW, Purves KL, et al.  
490 Classical Human Leukocyte Antigen Alleles and C4 Haplotypes Are Not Significantly  
491 Associated With Depression. *Biological Psychiatry*. Elsevier; 2020 Mar 1;87(5):419–30.
- 492 8. Nudel R, Benros ME, Krebs MD, Allesøe RL, Lemvig CK, Bybjerg-Grauholm J, et al.  
493 Immunity and mental illness: findings from a Danish population-based immunogenetic  
494 study of seven psychiatric and neurodevelopmental disorders. *European Journal of*  
495 *Human Genetics*. Nature Publishing Group; 2019 Apr 11;8(1):1.
- 496 9. Hu X, Daly M. What have we learned from six years of GWAS in autoimmune diseases,  
497 and what is next? *Current Opinion in Immunology*. Elsevier Current Trends; 2012 Oct  
498 1;24(5):571–5.
- 499 10. Euesden J, Danese A, Lewis CM, Maughan B. A bidirectional relationship between  
500 depression and the autoimmune disorders - New perspectives from the National Child  
501 Development Study. *PLOS ONE*. Public Library of Science; 2017 Mar;12(3):1–14.

- 502 11. Wray NR, Ripke S, Mattheisen M, Trzaskowski M, Byrne EM, Abdellaoui A, et al.  
503 Genome-wide association analyses identify 44 risk variants and refine the genetic  
504 architecture of major depression. *Nature Genetics*. Nature Publishing Group; 2018  
505 May;50:668–81.
- 506 12. Pouget JG, Schizophrenia Working Group of the Psychiatric Genomics Consortium, Han  
507 B, Wu Y, Mignot E, Ollila HM, et al. Cross-disorder analysis of schizophrenia and 19  
508 immune-mediated diseases identifies shared genetic risk. *Human Molecular Genetics*.  
509 2019 Jun 18.
- 510 13. Bycroft C, Freeman C, Petkova D, Band G, Elliott LT, Sharp K, et al. The UK Biobank  
511 resource with deep phenotyping and genomic data. *Nature*. Nature Publishing Group;  
512 2018 Oct 1;562(7726):203–9.
- 513 14. World Health Organization. *International Classification of Diseases (10th Edition)*.  
514 Geneva: World Health Organisation; 1992.
- 515 15. Davis KAS, Coleman JRI, Adams M, Allen N, Breen G, Cullen B, et al. Mental health in  
516 UK Biobank – development, implementation and results from an online questionnaire  
517 completed by 157 366 participants: a reanalysis. *BJPsych Open*. Cambridge University  
518 Press; 2020 Mar 1;6(2):e18.
- 519 16. Glanville KP, Coleman JRI, Howard DM, Pain O, Hanscombe KB, Jermy B, et al.  
520 Multiple measures of depression to enhance validity of major depressive disorder in the  
521 UK Biobank. *BJPsych Open*. Cambridge University Press; 2021 Mar 1;7(2):82.
- 522 17. Smith DJ, Nicholl BI, Cullen B, Martin D, Ul-Haq Z, Evans J, et al. Prevalence and  
523 Characteristics of Probable Major Depression and Bipolar Disorder within UK Biobank:  
524 Cross-Sectional Study of 172,751 Participants. Potash JB, editor. *PLOS ONE*. 2013 Nov  
525 25;8(11):e75362.
- 526 18. Chang CC, Chow CC, Tellier LC, Vattikuti S, Purcell SM, Lee JJ. Second-generation  
527 PLINK: rising to the challenge of larger and richer datasets. *GigaScience* [Internet]. 2015  
528 Feb 25;4(1):559. Available from: [www.cog-genomics.org/plink/1.9/](http://www.cog-genomics.org/plink/1.9/)
- 529 19. Manichaikul A, Mychaleckyj JC, Rich SS, Daly K, Sale M, Chen W-M. Robust  
530 relationship inference in genome-wide association studies. *Bioinformatics*. 2010 Nov  
531 15;26(22):2867–73.
- 532 20. Choi SW. `choishingwan/GreedyRelated`: Function update. 2020 Mar 4.
- 533 21. Abraham G, Qiu Y, Inouye M. FlashPCA2: principal component analysis of Biobank-  
534 scale genotype datasets. *Bioinformatics*. 2017 Sep 1;33(17):2776–8.

- 535 22. R Development Core Team. R: A language and environment for statistical computing  
536 [Internet]. Vienna, Austria: R Foundation for Statistical Computing; 2008. Available from:  
537 <http://www.R-project.org>
- 538 23. Dubois PCA, Trynka G, Franke L, Hunt KA, Romanos J, Curtotti A, et al. Multiple  
539 common variants for celiac disease influencing immune gene expression. *Nature*  
540 *Genetics*. Nature Publishing Group; 2010 Apr 1;42(4):295–302.
- 541 24. Liu JZ, van Sommeren S, Huang H, Ng SC, Alberts R, Takahashi A, et al. Association  
542 analyses identify 38 susceptibility loci for inflammatory bowel disease and highlight  
543 shared genetic risk across populations. *Nature Genetics*. Nature Publishing Group; 2015  
544 Sep 1;47(9):979–86.
- 545 25. The International Multiple Sclerosis Genetics Consortium & The Wellcome Trust Case  
546 Control Consortium 2. Genetic risk and a primary role for cell-mediated immune  
547 mechanisms in multiple sclerosis. *Nature*. Nature Publishing Group; 2011 Aug  
548 1;476(7359):214–9.
- 549 26. Renton AE, Pliner HA, Provenzano C, Evoli A, Ricciardi R, Nalls MA, et al. A Genome-  
550 Wide Association Study of Myasthenia Gravis. *JAMA neurology*. *JAMA Neurol*; 2015 Apr  
551 1;72(4):396–404.
- 552 27. Tsoi LC, Stuart PE, Tian C, Gudjonsson JE, Das S, Zawistowski M, et al. Large scale  
553 meta-analysis characterizes genetic architecture for common psoriasis associated  
554 variants. *Nature Communications*. Nature Publishing Group; 2017 May 24;8(1):1–8.
- 555 28. Aterido A, Cañete JD, Tornero J, Ferrándiz C, Pinto JA, Gratacós J, et al. Genetic  
556 variation at the glycosaminoglycan metabolism pathway contributes to the risk of  
557 psoriatic arthritis but not psoriasis. *Annals of the Rheumatic Diseases*. BMJ Publishing  
558 Group Ltd; 2019 Mar 1;78(3):355–64.
- 559 29. Okada Y, Di Wu, Trynka G, Raj T, Terao C, Ikari K, et al. Genetics of rheumatoid arthritis  
560 contributes to biology and drug discovery. *Nature*. Nature Publishing Group; 2014 Feb  
561 1;506(7488):376–81.
- 562 30. Bentham J, Morris DL, Graham DSC, Pinder CL, Tomblinson P, Behrens TW, et al.  
563 Genetic association analyses implicate aberrant regulation of innate and adaptive  
564 immunity genes in the pathogenesis of systemic lupus erythematosus. *Nature Genetics*.  
565 Nature Publishing Group; 2015 Dec 1;47(12):1457–64.
- 566 31. Choi SW, O'Reilly PF. PRSice-2: Polygenic Risk Score software for biobank-scale data.  
567 - PubMed - NCBI. *GigaScience*. 2019 Jul 15;8(7):2091.
- 568 32. Andres E, Serraj K. Optimal management of pernicious anemia. *Journal of blood*  
569 *medicine*. *J Blood Med*; 2012;3:97–103.

- 570 33. Simmonds MJ, Gough SCL. Unravelling the genetic complexity of autoimmune thyroid  
571 disease: HLA, CTLA-4 and beyond. *Clinical and Experimental Immunology*. Wiley-  
572 Blackwell; 2004 Apr 1;136(1):1–10.
- 573 34. Bradfield JP, Qu H-Q, Wang K, Zhang H, Sleiman PM, Kim CE, et al. A Genome-Wide  
574 Meta-Analysis of Six Type 1 Diabetes Cohorts Identifies Multiple Associated Loci.  
575 McCarthy MI, editor. *PLoS Genet*. Public Library of Science; 2011 Sep  
576 29;7(9):e1002293.
- 577 35. Spillane J, Higham E, Kullmann DM. Myasthenia gravis. *BMJ*. British Medical Journal  
578 Publishing Group; 2012 Dec 21;345(dec21 3):e8497–7.
- 579 36. Tsoi LC, Stuart PE, Tian C, Gudjonsson JE, Das S, Zawistowski M, et al. Large scale  
580 meta-analysis characterizes genetic architecture for common psoriasis associated  
581 variants. - PubMed - NCBI. *Nature Communications*. 2017 May 24;8:15382.
- 582 37. International Genetics of Ankylosing Spondylitis Consortium (IGAS). Identification of  
583 multiple risk variants for ankylosing spondylitis through high-density genotyping of  
584 immune-related loci. *Nature Genetics*. Nature Publishing Group; 2013 Jul 1;45(7):730–8.
- 585 38. Partington RJ, Muller S, Helliwell T, Mallen CD, Sultan AA. Incidence, prevalence and  
586 treatment burden of polymyalgia rheumatica in the UK over two decades: a population-  
587 based study. *Annals of the Rheumatic Diseases*. BMJ Publishing Group Ltd; 2018 Dec  
588 1;77(12):1750–6.
- 589 39. Humphreys JH, Verstappen SMM, Hyrich KL, Chipping JR, Marshall T, Symmons DPM.  
590 The incidence of rheumatoid arthritis in the UK: comparisons using the 2010  
591 ACR/EULAR classification criteria and the 1987 ACR classification criteria. Results from  
592 the Norfolk Arthritis Register. *Annals of the Rheumatic Diseases*. BMJ Publishing Group  
593 Ltd; 2013 Aug 1;72(8):1315–20.
- 594 40. Lessard CJ, Li H, Adrianto I, Ice JA, Rasmussen A, Grundahl KM, et al. Variants at  
595 multiple loci implicated in both innate and adaptive immune responses are associated  
596 with Sjögren's syndrome. *Nature Genetics*. *Nat Genet*; 2013 Oct 6;45(11):1284–92.
- 597 41. Rees F, Doherty M, Grainge M, Davenport G, Lanyon P, Zhang W. The incidence and  
598 prevalence of systemic lupus erythematosus in the UK, 1999–2012. *Annals of the*  
599 *Rheumatic Diseases*. BMJ Publishing Group Ltd; 2016 Jan 1;75(1):136–41.
- 600 42. Luigi Palla FD. A Fast Method that Uses Polygenic Scores to Estimate the Variance  
601 Explained by Genome-wide Marker Panels and the Proportion of Variants Affecting a  
602 Trait. *Am J Hum Genet*. Elsevier; 2015 Aug 6;97(2):250–9.
- 603 43. Bulik-Sullivan BK, Loh P-R, Finucane HK, Ripke S, Yang J, Schizophrenia Working  
604 Group of the Psychiatric Genomics Consortium, et al. LD Score regression distinguishes

- 605           confounding from polygenicity in genome-wide association studies. *Nature Genetics*.  
606           2015 Mar;47(3):291–5.
- 607   44.   Gold SM, Köhler-Forsberg O, Moss-Morris R, Mehnert A, Miranda JJ, Bullinger M, et al.  
608           Comorbid depression in medical diseases. *Nat Rev Dis Primers*. Nature Publishing  
609           Group; 2020 Aug 20;6(1):1–22.
- 610   45.   ME L, L T, J B, J C, de Boer P, Mondelli V, et al. Peripheral Blood Cell-Stratified  
611           Subgroups of Inflamed Depression. *Biological Psychiatry*. *Biol Psychiatry*; 2020 Jul  
612           15;88(2):185–96.
- 613   46.   Dube SR, Fairweather D, Pearson WS, Felitti VJ, Anda RF, Croft JB. Cumulative  
614           Childhood Stress and Autoimmune Diseases in Adults. *Psychosomatic Medicine*. 2009  
615           Feb;71(2):243–50.
- 616   47.   Hughes K, Bellis MA, Hardcastle KA, Sethi D, Butchart A, Mikton C, et al. The effect of  
617           multiple adverse childhood experiences on health: a systematic review and meta-  
618           analysis. *The Lancet Public Health*. Elsevier; 2017 Aug 1;2(8):e356–66.
- 619   48.   A F, T J L, C S, N D, L A, T S, et al. Comparison of Sociodemographic and Health-  
620           Related Characteristics of UK Biobank Participants With Those of the General  
621           Population. *American Journal of Epidemiology*. *Am J Epidemiol*; 2017 Nov  
622           1;186(9):1026–34.
- 623   49.   Batty GD, Gale C, Kivimaki M, Deary I, Bell S. Generalisability of Results from UK  
624           Biobank: Comparison With a Pooling of 18 Cohort Studies. *medRxiv*. Cold Spring Harbor  
625           Laboratory Press; 2019 Aug 13;:19004705.
- 626   50.   Duncan L, Shen H, Gelaye B, Meijsen J, Ressler K, Feldman M, et al. Analysis of  
627           polygenic risk score usage and performance in diverse human populations. *Nature*  
628           Communications. Nature Publishing Group; 2019 Jul 25;10(1):1–9.
- 629
